# Supplementary material
Source: publisher figshare collection journal article supplement (https://acs.figshare.com/ndownloader/files/36576910)
Supplement: Supplementary file 1 [file 36576910]

compound,SMILES,"TR-FRET IC50 SMARCA4 BD, µM","TR-FRET IC50 SMARCA2 BD, µM","TR-FRET IC50 PBRM1 BD5, µM","TR-FRET IC50 BRD4 BD1, µM","cellular EC50 (target engagement), µM","BROMOscan Kd, SMARCA4 BD, µM","BROMOscan Kd, SMARCA2 BD, µM","BROMOscan Kd, PBRM1 BD5, µM","BROMOscan Kd, PBRM1 BD2, µM"
2,NC(N=N1)=C(C2=CC=CC=C2)C=C1C3=CC=CC=C3,57.1 ± 0.6,n.d.,n.d,>100,n.d,10,4.4,27,5.7
4,NC(N=N1)=C(C2=CC=CC=C2)C=C1C3=CC=CC=C3O,0.03 ± 0.01,0.037 ± 0.004,0.0089±0.0005,27 ± 2 ,0.3 ± 0.02,0.086,0.071,0.069,0.55
5,OC1=CC=CC=C1C2=CC(N3CCN(C(C)=O)[C@H](C)C3)=C(N)N=N2,0.035 ± 0.001,n.d.,n.d ,34 ± 2,0.1,0.01,0.016,0.018,0.49
